# Supplementary material for: Thermal Characterization, Kinetic Analysis and Co-Combustion of Sewage Sludge Coupled with High Ash Ekibastuz Coal
Source: MDPI journal article supplement (doi:10.3390/en16186634), 2023-09-15
Supplement: s1 [file s1]

## SUPPLEMENTARY MATERIAL

### Thermal characterization, kinetic analysis and co-combustion of sewage sludge coupled with high ash Ekibastuz coal

Madiyar Aidabulov<sup>1</sup>, Daulet Zhakupov<sup>1</sup>, Khabiba Zhunussova<sup>1</sup>, Aknur Temireyeva<sup>1</sup>, Dhawal Shah<sup>1,\*</sup> and Yerbol Sarbassov<sup>2,\*</sup>

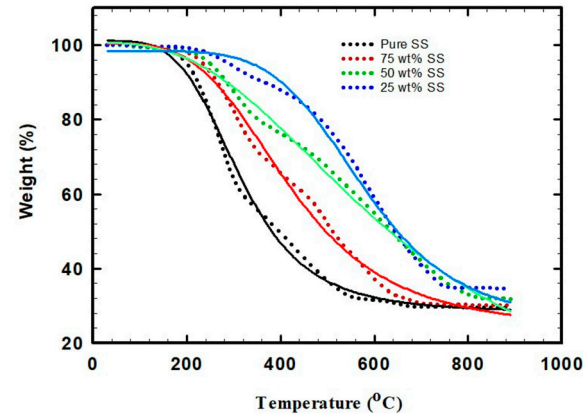

**Figure S1:** Regression analysis for the TGA curves for SS and bituminous coal at different blend ratios at heating of 15 °C/min in air.

Regression models:

$$\text{Pure SS weight (\%)} = -10^{-9}T^4 + 3 * 10^{-6}T^3 - 0.0018T^2 + 0.2414T + 93.356 \quad (E1)$$
$$R^2 = 0.9935$$

$$75 \text{ wt\% SS weight (\%)} = -5 * 10^{-10}T^4 + 10^{-6}T^3 - 0.001T^2 + 0.1707T + 93.846 \quad (E2)$$
$$R^2 = 0.9970$$

$$50 \text{ wt\% SS weight (\%)} = 2 * 10^{-7}T^3 - 0.0003T^2 + 0.0496T + 98.541 \quad (E3)$$
$$R^2 = 0.9969$$

$$25 \text{ wt\% SS weight (\%)} = 10^{-9}T^4 - 10^{-6}T^3 + 0.0006T^2 - 0.0825T + 98.541 \quad (E4)$$
$$R^2 = 0.9970$$

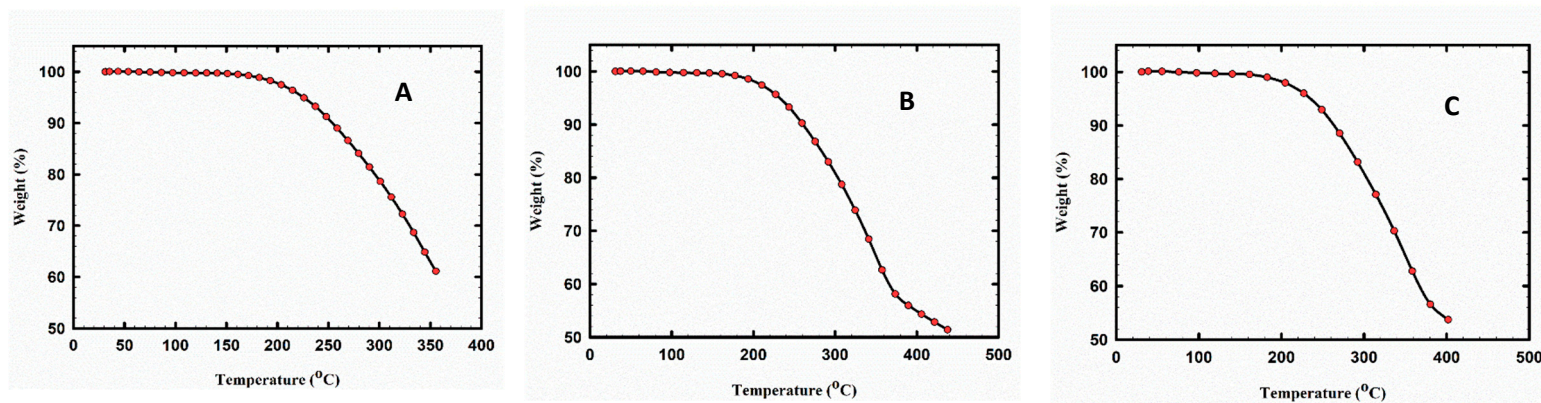

**Figure S2:** The thermographs of sewage sludge as obtained from the TGA experiments in nitrogen environment at A) 10 B) 15 C) 20 °C/min

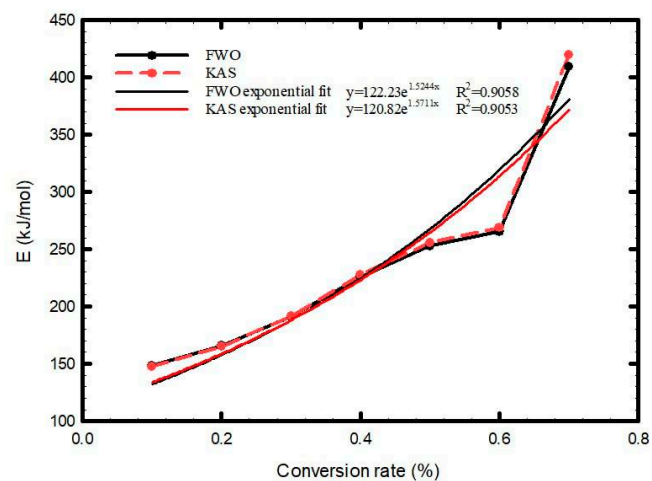

**Figure S3:** The exponential fit for both FWO and KAS models

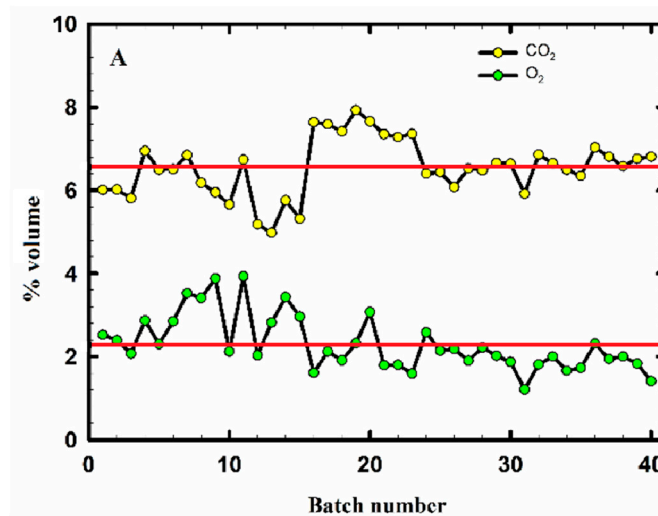

**Figure S4:** Analysis for O<sub>2</sub> and CO<sub>2</sub> concentrations emissions during the mono-combustion of SS in BFB rig.

In Figure S4, the average values for CO<sub>2</sub> emissions (6.55 % volume) and O<sub>2</sub> emissions (2.30 % volume) are shown. The standard deviations are  $\pm 0.69$  % volume and  $\pm 0.66$  % volume, respectively.

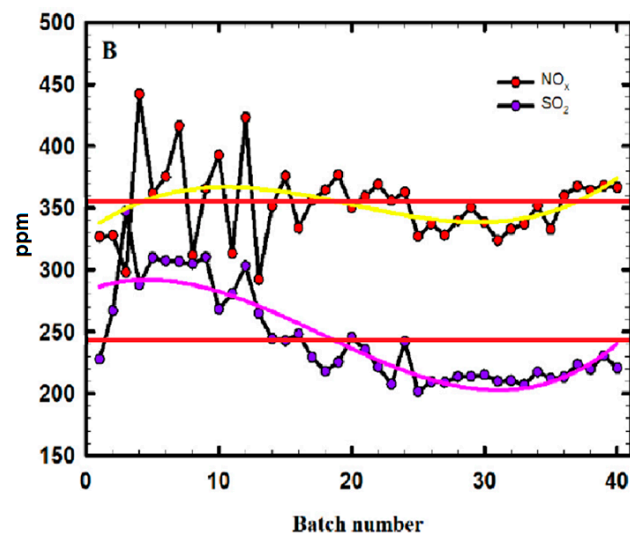

**Figure S5:** Analysis for SO<sub>2</sub> and NO<sub>x</sub> concentrations emissions during the mono-combustion of SS in BFB rig.

In Figure S5, the average values for NO<sub>x</sub> emissions (353.23 ppm) and SO<sub>2</sub> emissions (244.42 ppm) are shown. The standard deviations are  $\pm 30.85$  ppm and  $\pm 38.44$  ppm, respectively.

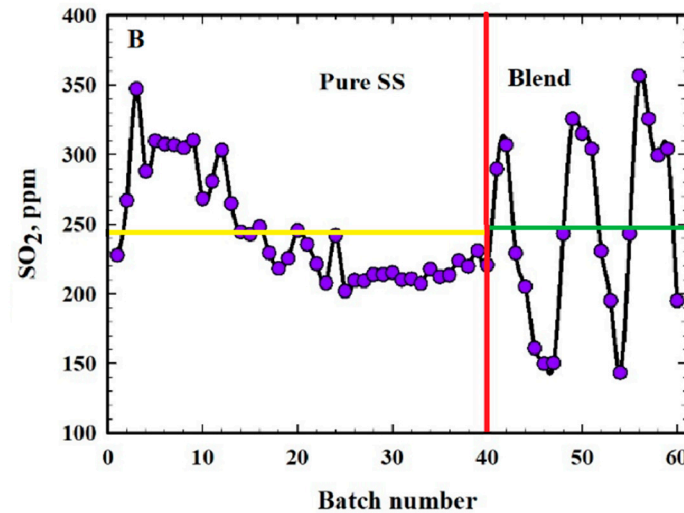

**Figure S6:** Analysis for SO<sub>2</sub> emissions

In Figure S6, the average values for SO<sub>2</sub> emissions for pure SS (244.42 ppm) and blend (248.65 ppm) are shown. The standard deviations are  $\pm 38.44$  ppm and  $\pm 68.22$  ppm, respectively.

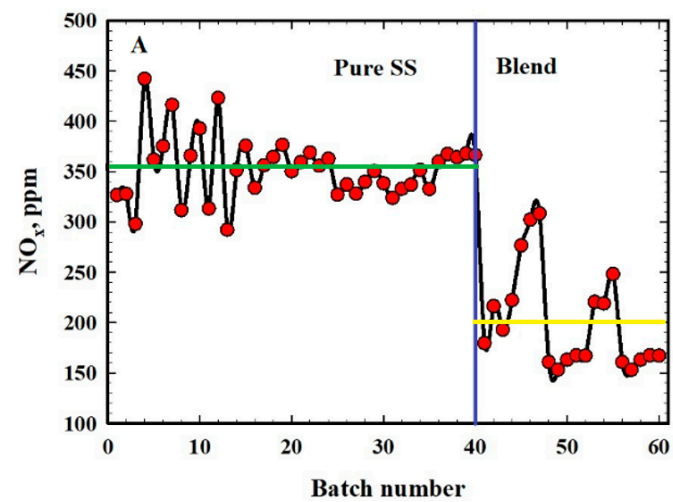

**Figure S7:** Analysis for NO<sub>x</sub> emissions

In Figure S7, the average values for NO<sub>x</sub> emissions for pure SS (353.23 ppm) and blend (200.53 ppm) are shown. The standard deviations are  $\pm 30.85$  ppm and  $\pm 49.65$  ppm, respectively.
