# Supplementary material for: Thermal Characterization, Kinetic Analysis and Co-Combustion of Sewage Sludge Coupled with High Ash Ekibastuz Coal
Source: MDPI journal article supplement (doi:10.3390/en16186634), 2023-09-15
Supplement: s1 [file s1]

Archive with 1 entries (1 files):
- energies-2575062-supplementary.pdf
